# Supplementary material
Source: publisher site journal article supplement (http://www.spandidos-publications.com/6293/downloadSupplementary)

Figure S1. Verification of the overexpression and knockdown efficacy of ANKZF1 siRNAs and lentivirus. Reverse transcription-quantitative PCR assay was used to detect the mRNA expression levels of ANKZF1 in (A) HT-29 cells transfected with siCtrl or siANKZF1, and (B) in HCT-116 cells transfected with Ctrl or ANKZF1 overexpression lentivirus. \*\* $P < 0.01$ , vs. the control. The results are presented as the mean  $\pm$  standard error of the mean. ANKZF1, ankyrin repeat and zinc-finger domain-containing 1.

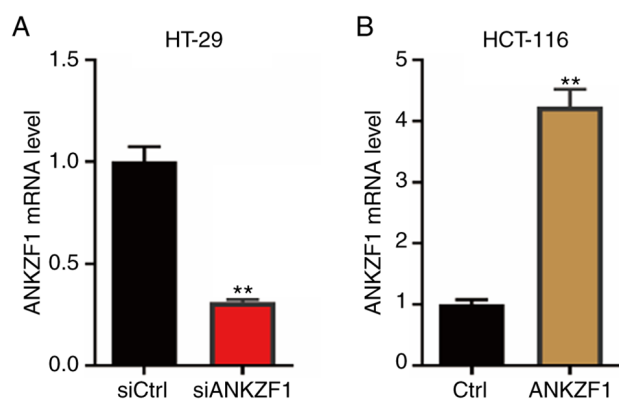

Supplement: Supplementary file 1 [file downloadSupplementary]
